# Supplementary material for: Targeting of Mcl-1 Expression by MiRNA-3614-5p Promotes Cell Apoptosis of Human Prostate Cancer Cells
Source: MDPI journal article supplement (doi:10.3390/ijms23084194), 2022-04-11
Supplement: s1 [file s1]

# Targeting of Mcl-1 expression by miR-3614-5p promotes cell apoptosis of human prostate cancer cells

Yi-Hsien Hsieh, Fang-Jung Yu, Yasser Nassef, Chung-Jung Liu, Yong-Syuan Chen, Ching-Yi Lin, Jia-Liang Feng, Min-Hua Wu

## Supplementary Figure S1

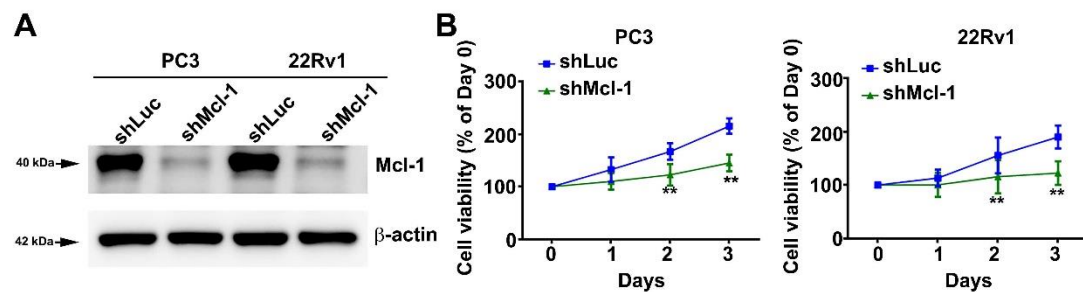

**Supplementary Figure S1:** Knockdown of Mcl-1 on cell viability in human PC3 and 22Rv1 prostate cancer cells. (A) The Mcl-1 protein expression of knockdown Mcl-1 in human PC3 and 22Rv1 prostate cancer cells by immunoblotting assay. (B) Cell viability were measured with MTT assay.  $\beta$ -actin as a protein loading control. \*\*,  $p < 0.01$  versus shLuc cells or Day 0 (cell viability), (Mean  $\pm$  SE,  $n = 3$ ).
